# Supplementary material
Source: Springer Nature journal article supplement (https://www.springermedizin.de/resource/supplementary/13014_2013_1061_MOESM3_ESM.pdf/9635234)

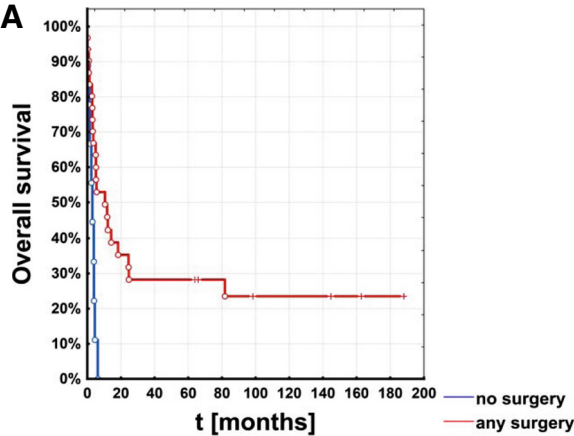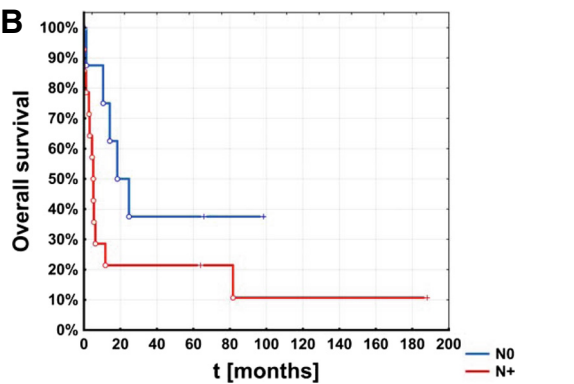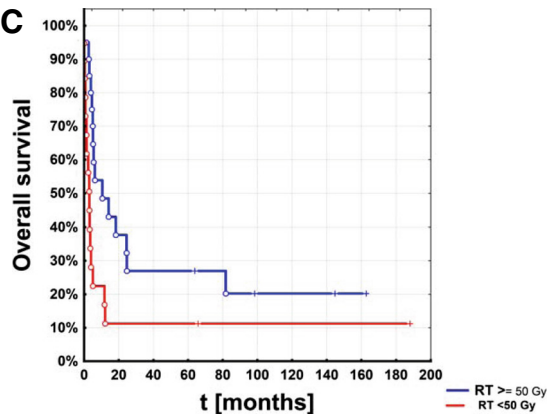

Supplement: MOESM3 [file 9635234]
